# Supplementary material
Source: publisher figshare collection journal article supplement (https://acs.figshare.com/ndownloader/files/5078323)
Supplement: Supplementary file 1 [file 5078323]

# $^{29}\text{Si}$ NMR Studies of Zeolite Precursor Solutions

## Supporting Information

*Chil-Hung Cheng and Daniel F. Shantz\**

\*Correspondence: Daniel F. Shantz, Department of Chemical Engineering,

Texas A&M University, College Station TX 77843-3122

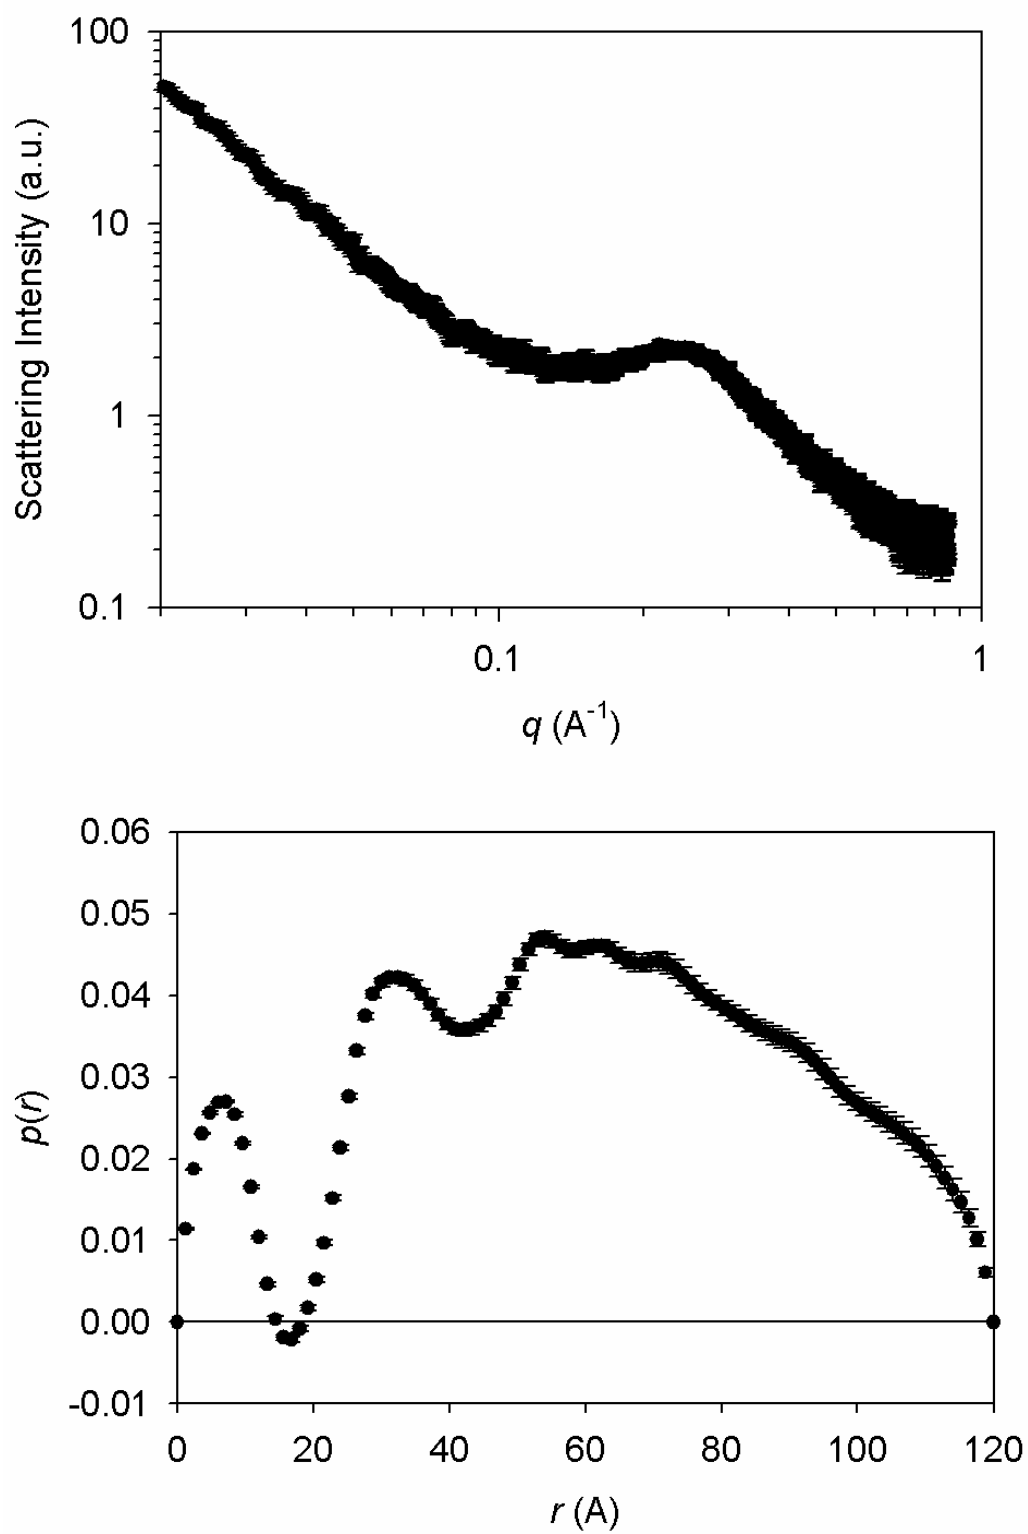

Figure 1S. (top)SAXS data of sample measured in Figures 1,2, and 4. (bottom) pair distance distribution function (determined using the packing GNOM).

Estimation of the relative population of the 2 nm and 20 nm particles from the SAXS data

$$M = \frac{I(0)a^2}{P(\Delta\rho^2)dcI_e N}$$

$a$ : the distance between the sample and the detector.

$d$ : is the sample thickness.

$P$ : is the total intensity,

$c$ : is the concentration of the solute,

$I_e$ : is the scattering intensity of a single electron, 2

$N$ : the Avogadro's number

$\Delta\rho$ : the excess electron density.

$M$  is the molecular weight. Here it is assumed to be the particle weight, based on that the mass can be estimated as

$$M = \frac{4}{3}\pi(r)^3 \rho$$

$\rho$ : the density of the particle

$r$ : the radius of the particle

Then

$$\frac{M_1}{M_2} = \frac{I_1(0)c_2}{I_2(0)c_1}$$

$$\frac{c_1}{c_2} = \frac{I_1(0)M_2}{I_2(0)M_1} = \frac{I_1(0)(r_2)^3}{I_2(0)(r_1)^3}$$

assuming the density of the particles with different particle size are the same.

Divide the SAXS curve into two parts:

(1)  $0.02 \leq q \leq 0.11$

(2)  $0.15 \leq q \leq 0.8$

$I_1(0) = 94$ , and  $I_2(0) = 4.68$ .  $r_1 = 10$  nm and  $r_2 = 1$  nm

$$c_2 \approx 50 c_1$$

The  $I(0)$  values used were estimated/determined using the inverse fourier transform method (software package – GNOM)

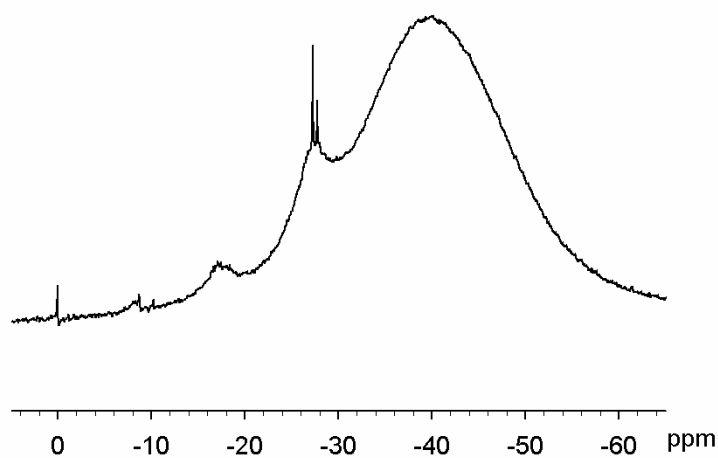

Figure 2S. NMR spectrum of a solution with composition 1 TEOS: 0.18 TMBDMP[OH<sup>-</sup>]<sub>2</sub>: 20 H<sub>2</sub>O, (TMBDMP[OH<sup>-</sup>]<sub>2</sub> = 4,4'-trimethylene-bis(1,1'-dimethylpiperidinium) dihydroxide) aged at room temperature for 24 hours. Chemical shifts referenced to monomer as  $\delta = 0$  ppm.

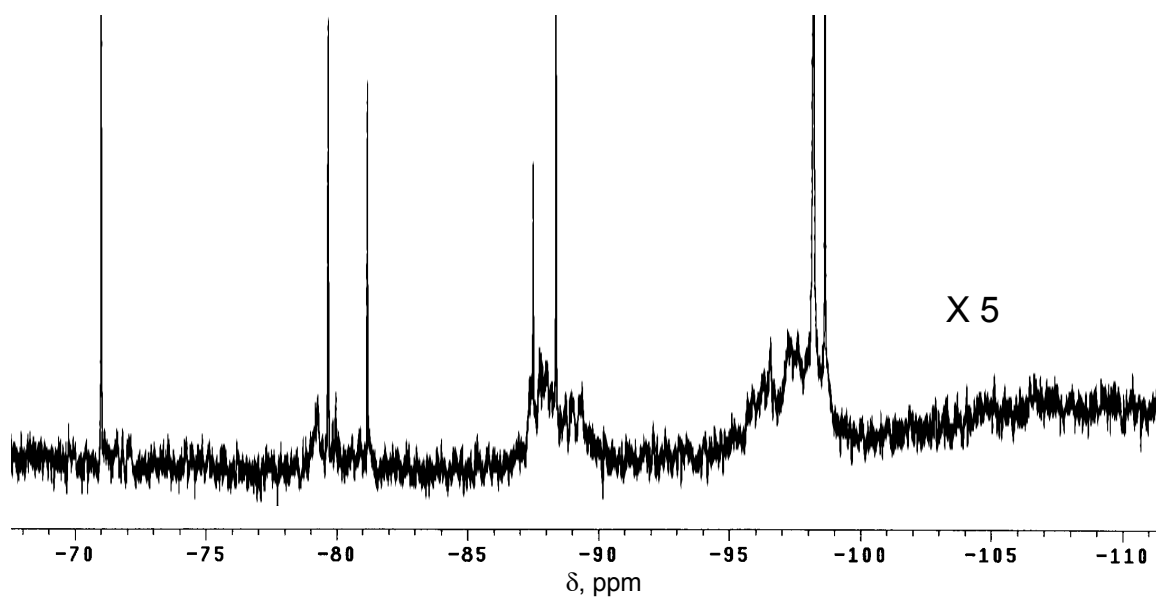

Figure 3S. Expanded plot of Figure 5, showing the low intensity resonances.
